# Supplementary material for: The Effects of a 12-Week-Long Sand Exercise Training Program on Neuromechanical and Functional Parameters in Type II Diabetic Patients with Neuropathy
Source: MDPI journal article supplement (doi:10.3390/ijerph20075413), 2023-04-05
Supplement: s1 [file s1]

| TRAINING PERIOD     | WEEK 1-4                                                                                                                                                                                                                                                                                                                                                                                                                                                                                                                                                                                                                                                                                                                            | WEEK 5-8                                                                                                                                                                                                                                                                                                                                                                                                                                                                                                                                                                                                                                                                                                                                                                                                                                                                                                                                 | WEEK 9-12                                                                                                                                                                                                                                                                                                                                                                                                                                                                                                                                                                                                                                                                                                                                                                                                                                                                                                                                                                                                                                                                                                                                                                                                                                     |
|---------------------|-------------------------------------------------------------------------------------------------------------------------------------------------------------------------------------------------------------------------------------------------------------------------------------------------------------------------------------------------------------------------------------------------------------------------------------------------------------------------------------------------------------------------------------------------------------------------------------------------------------------------------------------------------------------------------------------------------------------------------------|------------------------------------------------------------------------------------------------------------------------------------------------------------------------------------------------------------------------------------------------------------------------------------------------------------------------------------------------------------------------------------------------------------------------------------------------------------------------------------------------------------------------------------------------------------------------------------------------------------------------------------------------------------------------------------------------------------------------------------------------------------------------------------------------------------------------------------------------------------------------------------------------------------------------------------------|-----------------------------------------------------------------------------------------------------------------------------------------------------------------------------------------------------------------------------------------------------------------------------------------------------------------------------------------------------------------------------------------------------------------------------------------------------------------------------------------------------------------------------------------------------------------------------------------------------------------------------------------------------------------------------------------------------------------------------------------------------------------------------------------------------------------------------------------------------------------------------------------------------------------------------------------------------------------------------------------------------------------------------------------------------------------------------------------------------------------------------------------------------------------------------------------------------------------------------------------------|
| SESSION DURATION    | 30 MINUTES                                                                                                                                                                                                                                                                                                                                                                                                                                                                                                                                                                                                                                                                                                                          | 37 MINUTES                                                                                                                                                                                                                                                                                                                                                                                                                                                                                                                                                                                                                                                                                                                                                                                                                                                                                                                               | 45 MINUTES                                                                                                                                                                                                                                                                                                                                                                                                                                                                                                                                                                                                                                                                                                                                                                                                                                                                                                                                                                                                                                                                                                                                                                                                                                    |
| MAIN PART EXERCISES | <ol style="list-style-type: none"> <li>1. Jogging 16x</li> <li>2. With the dorsal side of the toes, flicking sand 6xleft foot, 6xright foot</li> <li>3. Caterpillar movements forward and backward 3xleft foot, 3xright foot</li> <li>4. Dorsal flexion alternating 16x, both 8x</li> <li>5. Heel rise 10x</li> <li>6. With the dorsal side of the foot lifting sand and putting it to side 6xleft, 6xright</li> <li>7. Sand grip with toes, bent leg lift, after knee extension, spreading the sand 3xleft, 3xright</li> <li>8. Drawing palm tree, outward with the dorsal, inward with the plantar side of the foot 2xleft, 2xright</li> <li>9. Covering foot with sand 1xleft, 1xright</li> <li>10. walking in circle</li> </ol> | <ol style="list-style-type: none"> <li>1. Jogging 24x</li> <li>2. With the dorsal side of the toes, flicking sand 8xleft foot, 8x right foot</li> <li>3. Caterpillar movements forward and backward 4xleft foot, 4xright foot</li> <li>4. Dorsal flexion alternating 20x, both 12x</li> <li>5. Heel rise 15x</li> <li>6. With the dorsal side of the foot lifting sand and putting it to side 8xleft, 8xright</li> <li>7. Sand grip with toes, bent leg lift, after knee extension, spreading the sand 4xleft, 4xright</li> <li>8. Drawing palm tree, outward with the dorsal, inward with the plantar side of the foot 3xleft, 3xright</li> <li>9. Covering foot with sand 1xleft, 1xright</li> <li>10. walking in circle</li> <li>11. walking on toes ¼ circle</li> <li>12. walking on heel ¼ circle</li> <li>13. walking on outer sole ¼ circle</li> <li>14. walking on inner sole ¼ circle</li> <li>15. walking in circle</li> </ol> | <ol style="list-style-type: none"> <li>1. Jogging 32x</li> <li>2. With the dorsal side of the toes, flicking sand 10xleft foot, 10xright foot</li> <li>3. Caterpillar movements forward and backward 5xleft foot, 5xright foot</li> <li>4. Dorsal flexion alternating 24x, both 16x</li> <li>5. Heel rise 20x</li> <li>6. With the dorsal side of the foot lifting sand and putting it to side 10xleft, 10xright</li> <li>7. Sand grip with toes, bent leg lift, after knee extension, spreading the sand 5xleft, 5xright</li> <li>8. Drawing palm tree, outward with the dorsal, inward with the plantar side of the foot 4xleft, 4xright</li> <li>9. Covering foot with sand 1xleft, 1xright</li> <li>10. With bending the support leg, pushing sand backward with the plantar side of the foot, pulling sand forward with the dorsal side of the foot 5xleft, 5x right</li> <li>11. squat 8x</li> <li>12. squat with rising onto the toes 8x</li> <li>13. walking in circle</li> <li>14. walking on toes ¼ circle</li> <li>15. walking on heel ¼ circle</li> <li>16. walking on outer sole ¼ circle</li> <li>17. walking on inner sole ¼ circle</li> <li>18. walking in circle with long strides</li> <li>19. walking in circle</li> </ol> |
